# Supplementary material for: Characterization of Voltage-Gated Potassium Channels in Human Neural Progenitor Cells
Source: PLoS One. 2009 Jul 8;4(7):e6168. doi: 10.1371/journal.pone.0006168 (PMC2702754; doi:10.1371/journal.pone.0006168)
Supplement: Results S1 — (0.03 MB DOC) [file pone.0006168.s004.doc]

# Results S1

**Pharmacological inhibition of Kv currents in hNPCs by MTX**

To selectively inhibit IK the neurotoxin margatoxin (MTX) was applied in addition to α‑dendrotoxin (DTX). Both are considered to acts as antagonists on Kv1 channels [32]. MTX specifically inhibited IK in hNPCs, while it was ineffective in blocking IA (Fig. S1). MTX showed a similar concentration dependency (slope 0.5) and IC50 value (180.7 nM) compared to DTX (IC50 = 163.9 nM, slope 0.7; Fig. S1). Because the channel transcripts Kv1.2 and 1.3 showed low expression levels, it predominantly inhibited Kv1.1, while DTX additionally blocked Kv1.6 (Fig.3, Tab. S1).
